# Supplementary material for: Genesis of New Particle Formation Events in a Semi-Urban Location in Eastern Himalayan Foothills
Source: MDPI journal article supplement (doi:10.3390/atmos14050795), 2023-04-27
Supplement: s1 [file s1]

Archive with 1 entries (1 files):
- atmosphere-2268419-supplementary.pdf
