# Supplementary material for: Genesis of New Particle Formation Events in a Semi-Urban Location in Eastern Himalayan Foothills
Source: MDPI journal article supplement (doi:10.3390/atmos14050795), 2023-04-27
Supplement: s1 [file s1 › atmosphere-2268419-supplementary.pdf]

## Supplementary: Genesis of new particle formation events in a semi-urban location in Eastern Himalayan Foothills

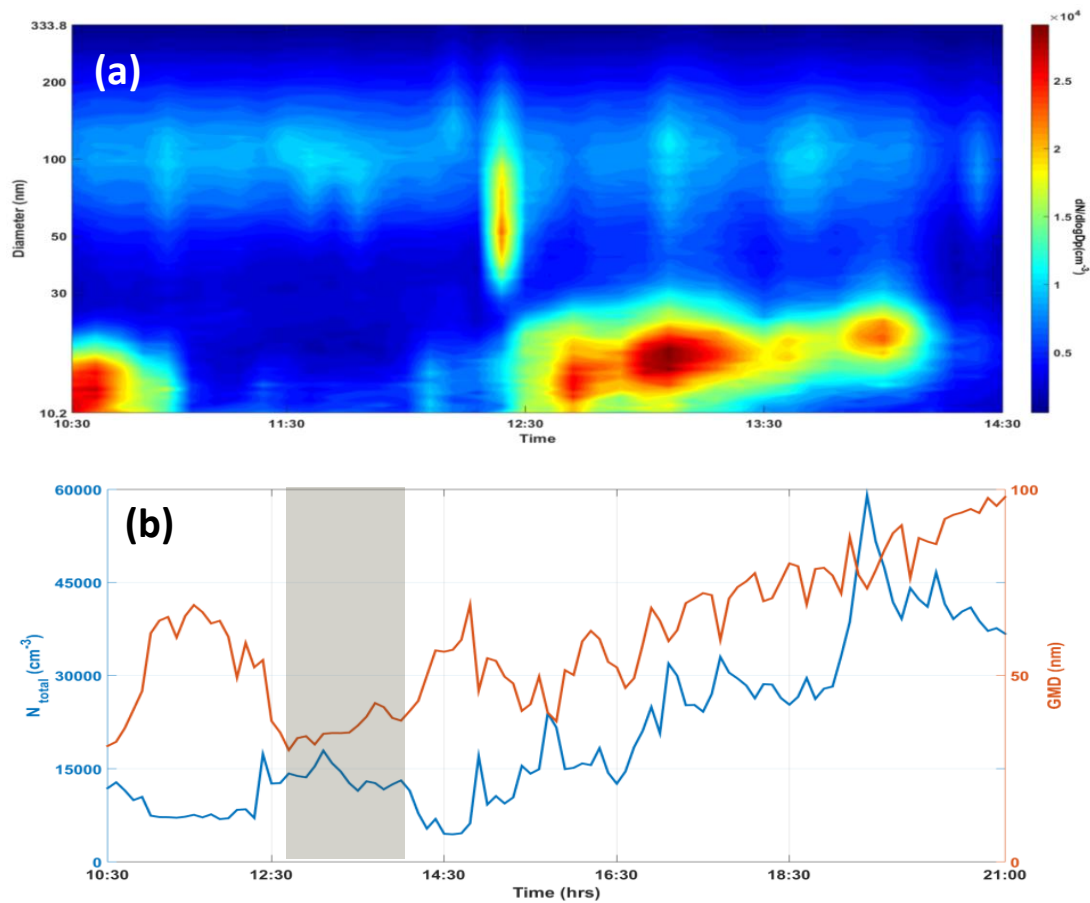

**Figure S1.** Representative observation of NPF event on 2 December 2016 (a) Contour plot of number concentration showing the formation and growth of new particles between 12:42-14:12 hrs and, (b) Variation of  $N_{\text{total}}$ , and GMD from 10:30 hrs to 21:00 hrs, where the shaded portion is the event period.

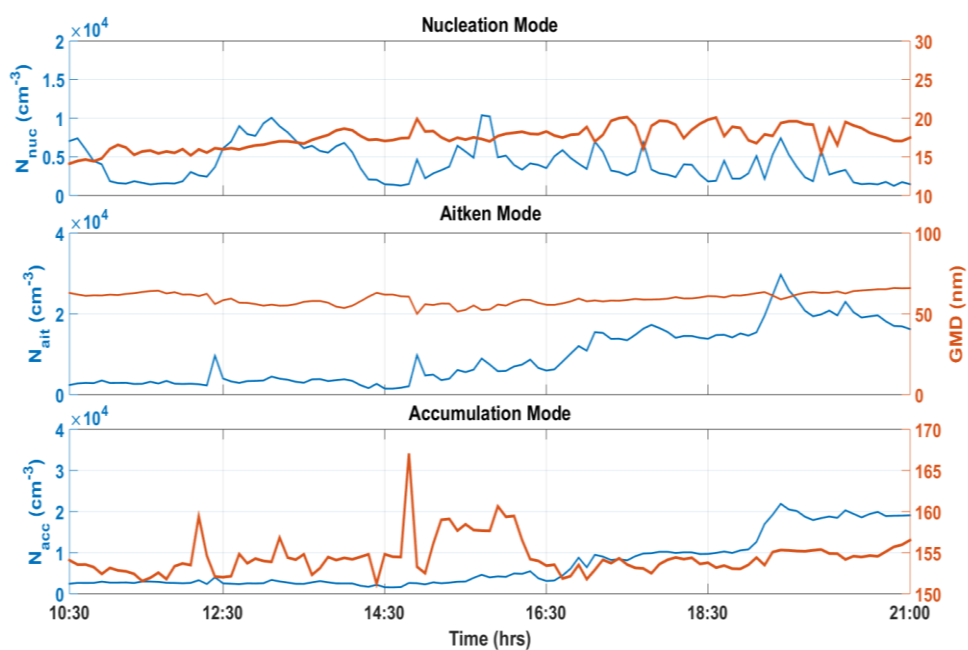

**Figure S2.** Variation of number concentration and GMD of nucleation (top), Aitken (middle) and accumulation (bottom) mode particles on 2 December 2016 from 10:30 hrs to 21:00 hrs.

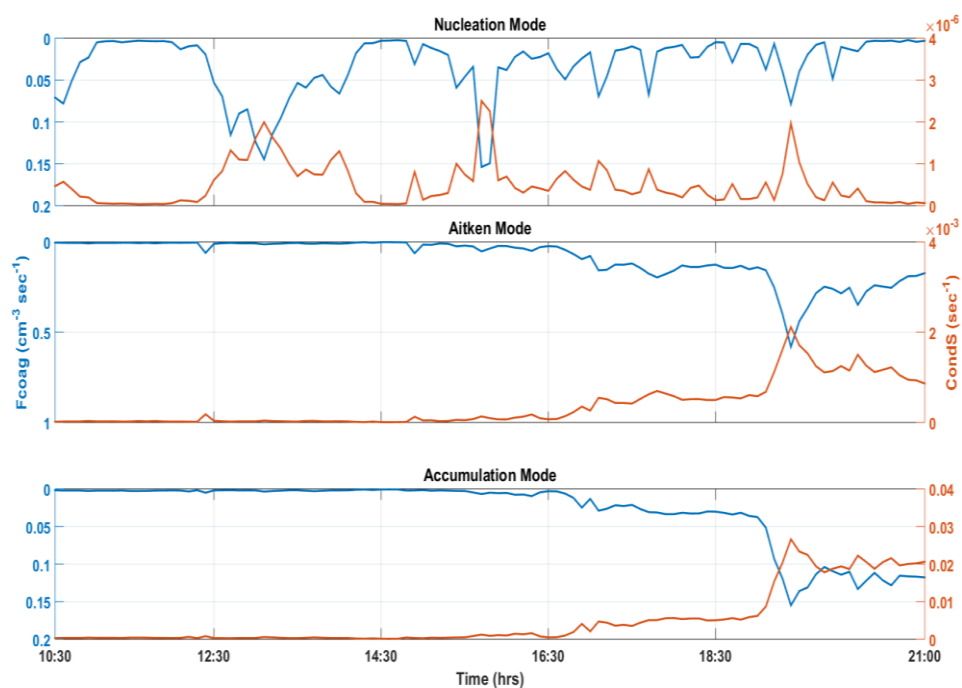

**Figure S3.** Variation of  $F_{coag}$  and  $CondS$  for Nucleation (top), Aitken (middle) and Accumulation (bottom) mode particles on 2 December 2016.

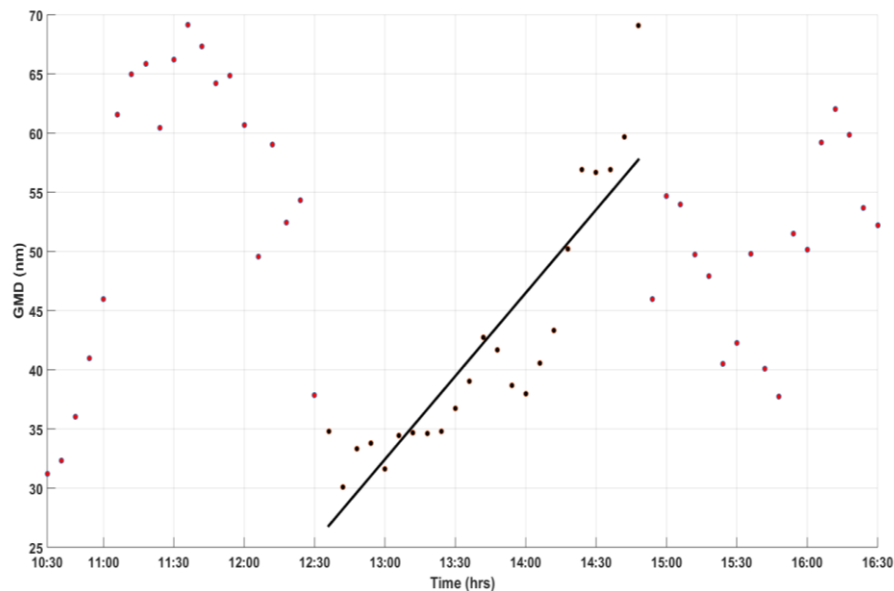

**Figure S4.** Scatter plot between the GMD versus local time. The solid line is the regression fit through GMD data points during the NPF growth period on 2 December 2016.

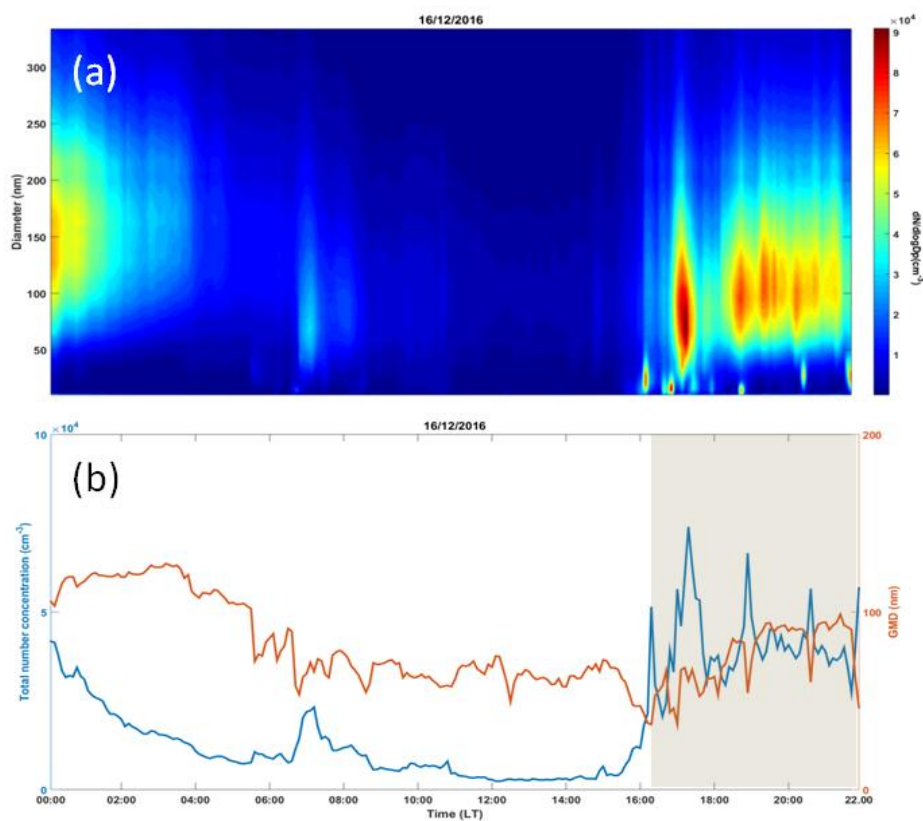

**Figure S5.** Representative observation of NPF event on 16 December 2016 (a) Contour plot of number concentration showing the formation and growth of new particles between 16:00-21:48 hrs and, (b) Variation of  $N_{\text{total}}$ , and GMD from midnight hrs to 22:00 hrs, where the shaded portion is the event period.

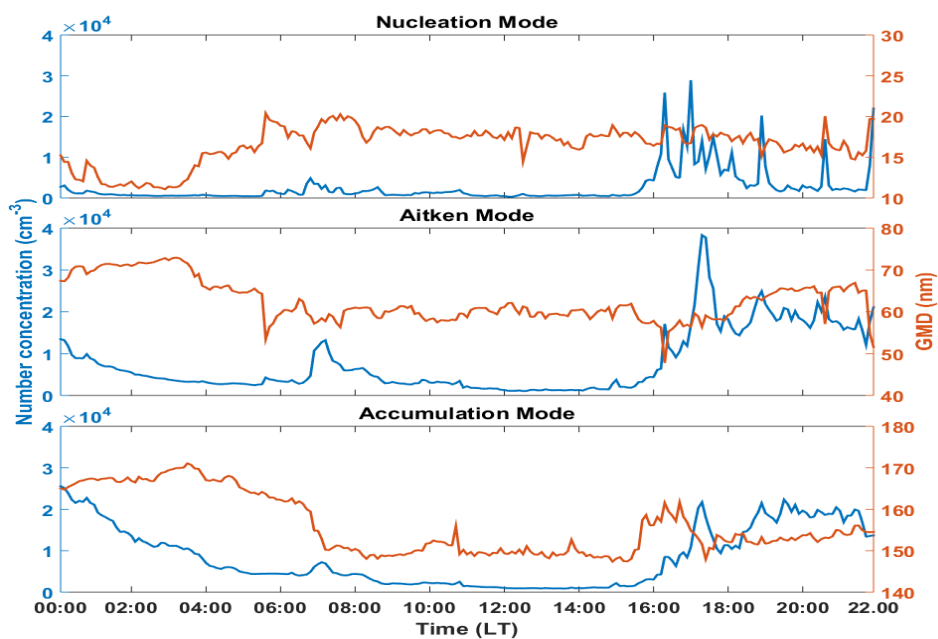

**Figure S6.** Variation of number concentration and GMD of nucleation (top), Aitken (middle) and accumulation (bottom) mode particles on 16 December 2016 from midnight to 22:00 hrs.

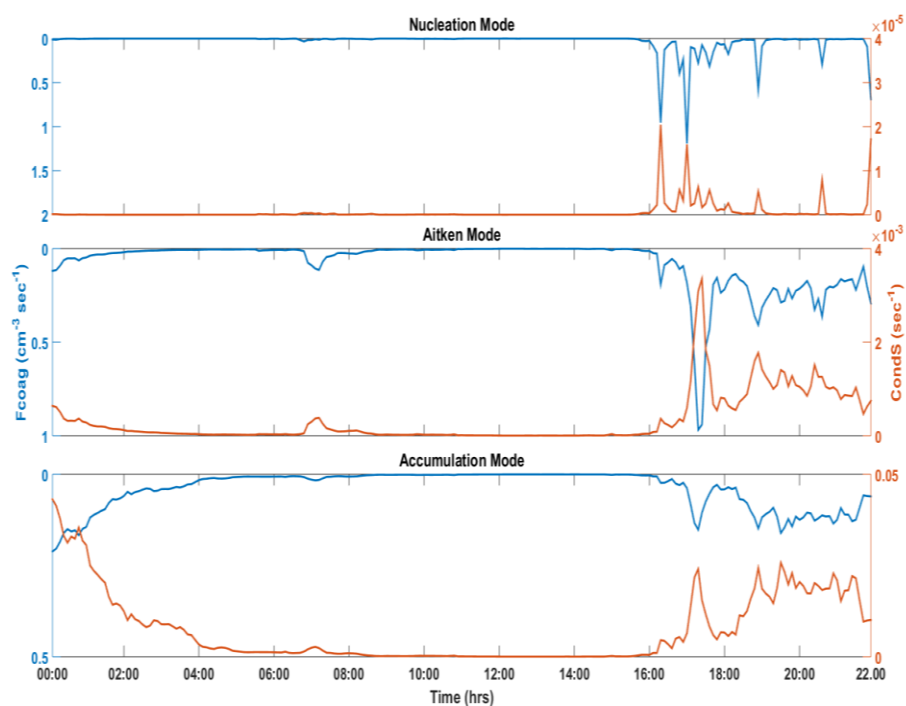

**Figure S7.** Variation of  $F_{\text{coag}}$  and  $\text{CondS}$  for Nucleation (top), Aitken (middle) and Accumulation (bottom) mode particles on 16 December 2016.

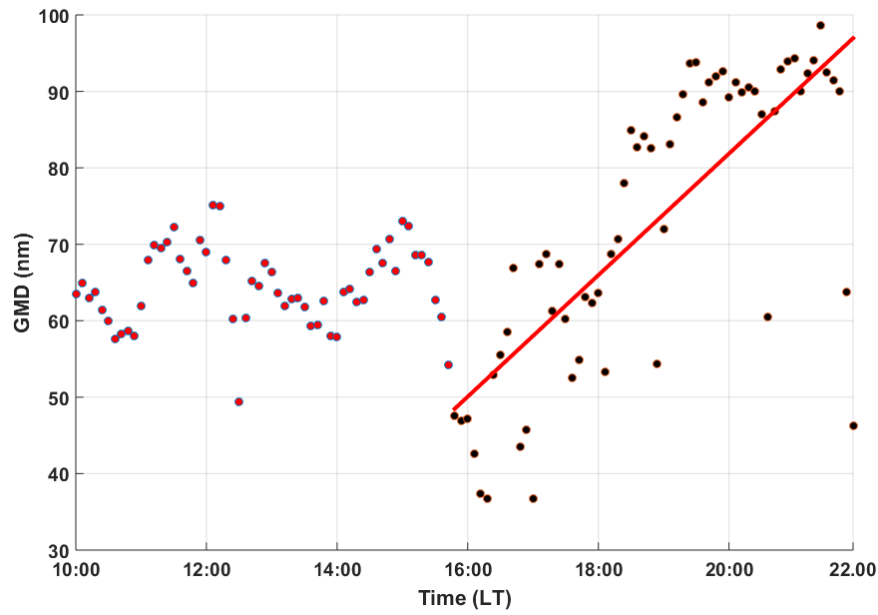

**Figure S8.** Scatter plot between the GMD versus local time. The solid line is the regression fit through GMD data points during the NPF growth period on 16 December 2016.

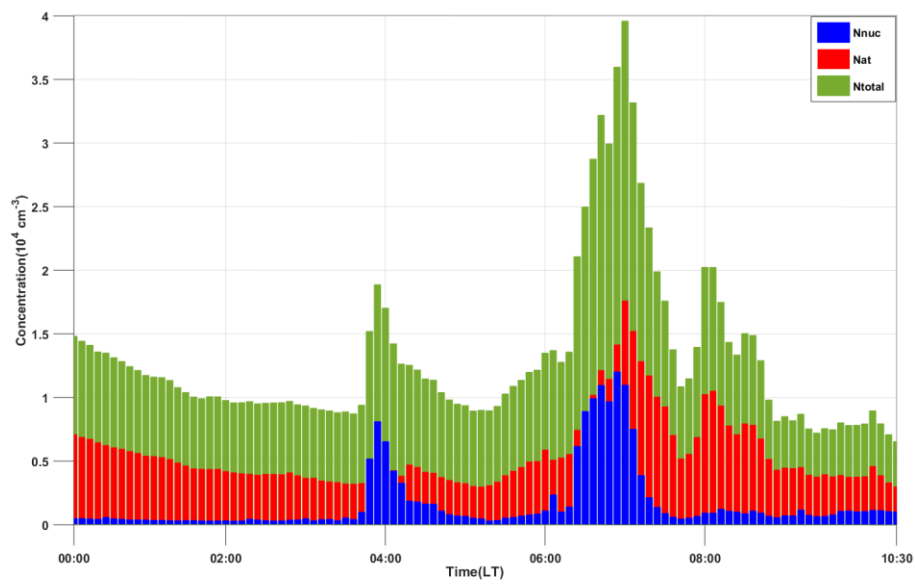

**Figure S9:** Contribution of  $N_{\text{nuc}}$  and  $N_{\text{ait}}$  to the  $N_{\text{total}}$  on 3 December 2016.

**Table S1:** Summary statistics of calculated parameters in different size regime on 3 December, 2016

| Parameters                                                   | Mean                  | SD                    | Median                | Minimum               | Maximum               |
|--------------------------------------------------------------|-----------------------|-----------------------|-----------------------|-----------------------|-----------------------|
| $N_{\text{nuc}} (\text{cm}^{-3})$                            | 1590                  | 2612                  | 618.76                | 216.38                | 11943.56              |
| $N_{\text{ait}} (\text{cm}^{-3})$                            | 5572                  | 2810                  | 4484.66               | 2943.00               | 17566.01              |
| $N_{\text{acc}} (\text{cm}^{-3})$                            | 5585                  | 1741                  | 5685.85               | 2620.94               | 11114.20              |
| $\text{CondS}_{\text{nuc}} (\text{sec}^{-1})$                | $2.40 \times 10^{-7}$ | $7.09 \times 10^{-7}$ | $1.22 \times 10^{-8}$ | $1.01 \times 10^{-9}$ | $3.86 \times 10^{-6}$ |
| $\text{CondS}_{\text{ait}} (\text{sec}^{-1})$                | $1.06 \times 10^{-4}$ | $1.05 \times 10^{-4}$ | $6.18 \times 10^{-5}$ | $2.60 \times 10^{-5}$ | $6.50 \times 10^{-4}$ |
| $\text{CondS}_{\text{acc}} (\text{sec}^{-1})$                | $2.00 \times 10^{-3}$ | $1.30 \times 10^{-3}$ | $1.92 \times 10^{-3}$ | $3.50 \times 10^{-3}$ | $6.94 \times 10^{-3}$ |
| $\text{CoagS}_{\text{nuc}} (\text{sec}^{-1})$                | $2.27 \times 10^{-6}$ | $3.37 \times 10^{-6}$ | $5.69 \times 10^{-7}$ | $1.45 \times 10^{-6}$ | $1.70 \times 10^{-5}$ |
| $\text{CoagS}_{\text{ait}} (\text{sec}^{-1})$                | $3.67 \times 10^{-6}$ | $1.85 \times 10^{-6}$ | $4.46 \times 10^{-6}$ | $5.14 \times 10^{-6}$ | $9.31 \times 10^{-6}$ |
| $\text{CoagS}_{\text{acc}} (\text{sec}^{-1})$                | $1.89 \times 10^{-6}$ | $0.56 \times 10^{-6}$ | $2.29 \times 10^{-6}$ | $1.96 \times 10^{-6}$ | $3.20 \times 10^{-6}$ |
| $\text{Fcoag}_{\text{nuc}} (\text{cm}^{-3} \text{sec}^{-1})$ | 0.013                 | 0.0385                | $5.46 \times 10^{-3}$ | $1.41 \times 10^{-3}$ | $2.03 \times 10^{-1}$ |
| $\text{Fcoag}_{\text{ait}} (\text{cm}^{-3} \text{sec}^{-1})$ | 0.021                 | 0.0319                | $1.32 \times 10^{-2}$ | $9.83 \times 10^{-6}$ | $1.31 \times 10^{-1}$ |
| $\text{Fcoag}_{\text{acc}} (\text{cm}^{-3} \text{sec}^{-1})$ | 0.002                 | 0.0013                | $1.04 \times 10^{-2}$ | $3.21 \times 10^{-3}$ | $3.17 \times 10^{-2}$ |
